# Supplementary material for: Bioaccumulation of Trace Elements from Aqueous Solutions by Selected Terrestrial Moss Species
Source: Biology (Basel). 2022 Nov 23;11(12):1692. doi: 10.3390/biology11121692 (PMC9774717; doi:10.3390/biology11121692)
Supplement: Supplementary file 1 [file biology-11-01692-s001.zip › biology-2017863-supplementary.pdf]

a)

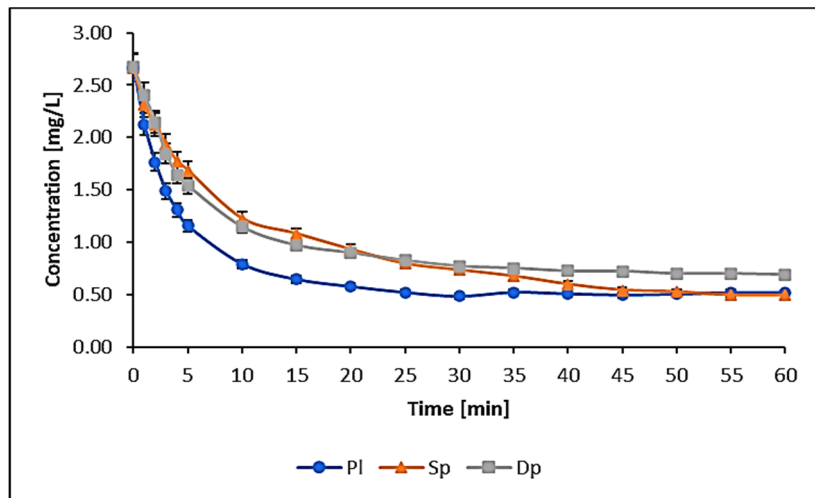

b)

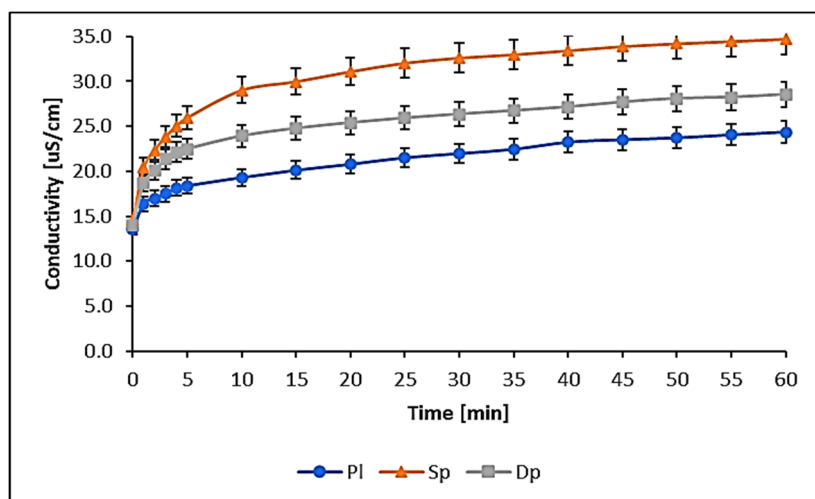

c)

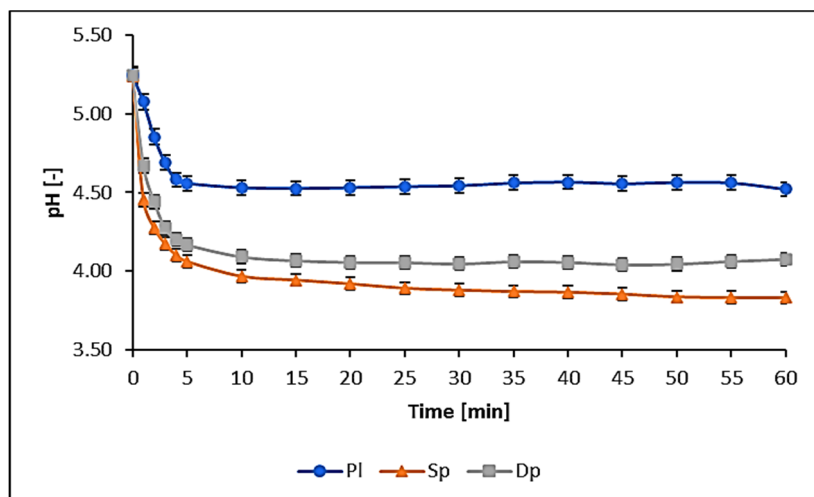

Figure S1. Changes in physicochemical parameters in Ni solution during the accumulation process on moss gametophytes: a) its concentration, b) conductivity, c) pH

a)

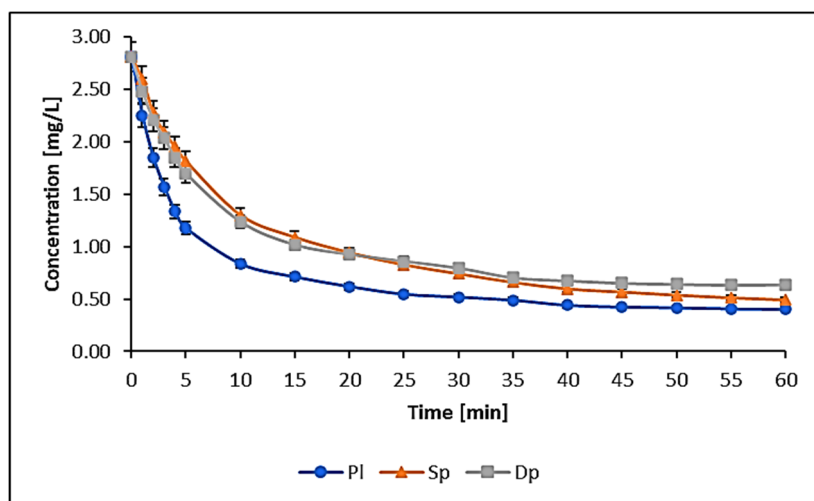

b)

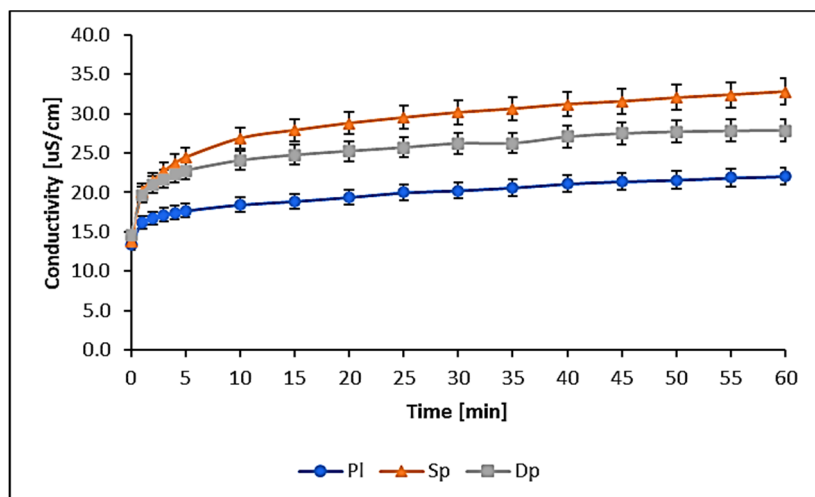

c)

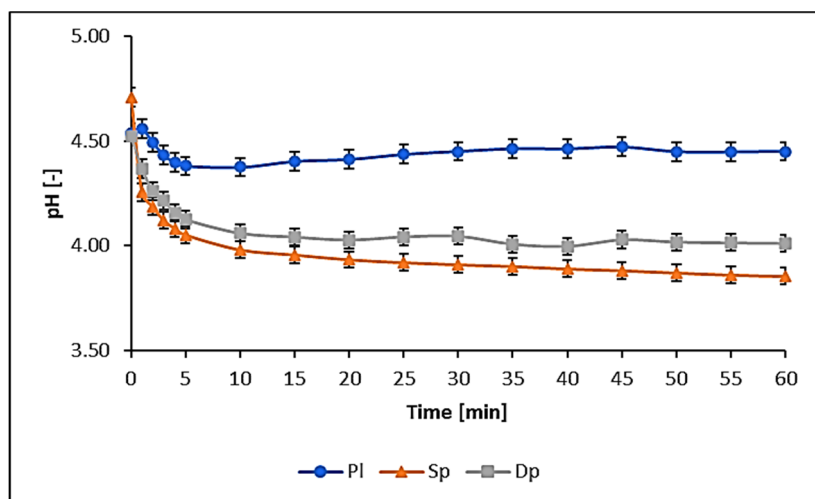

**Figure S2.** Changes in physicochemical parameters in Zn solution during the accumulation process on moss gametophytes: a) its concentration, b) conductivity, c) pH

a)

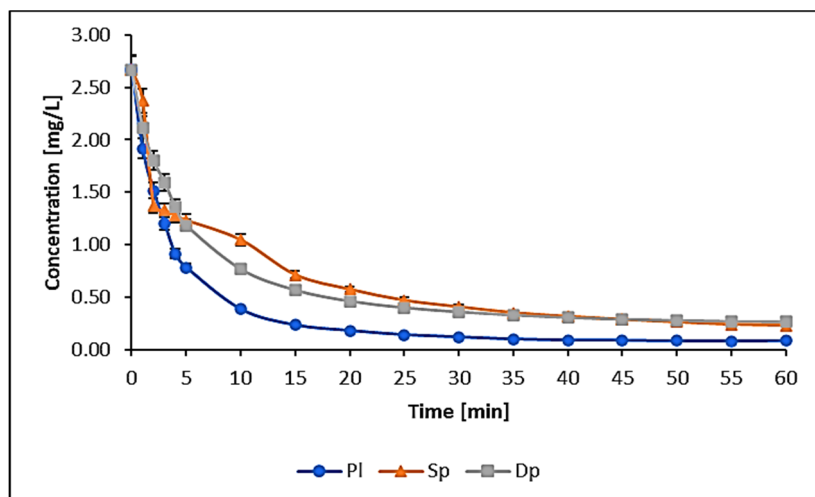

b)

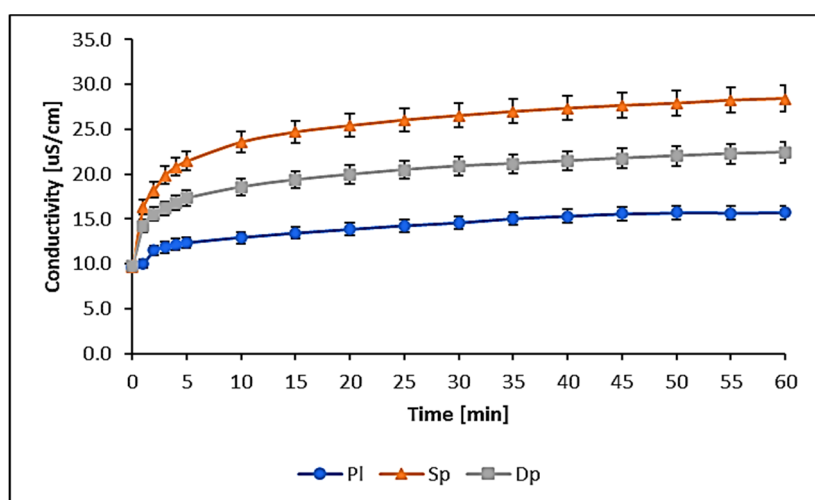

c)

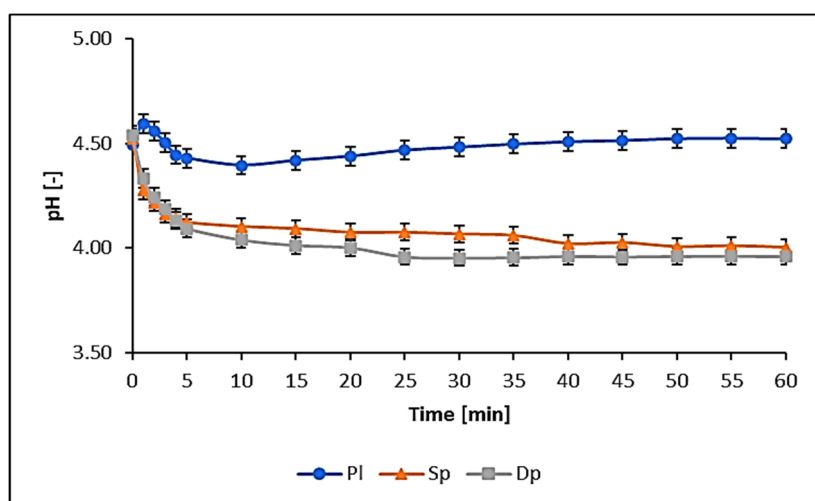

**Figure S3.** Changes in physicochemical parameters in Cd solution during the accumulation process on moss gametophytes: a) its concentration, b) conductivity, c) pH

a)

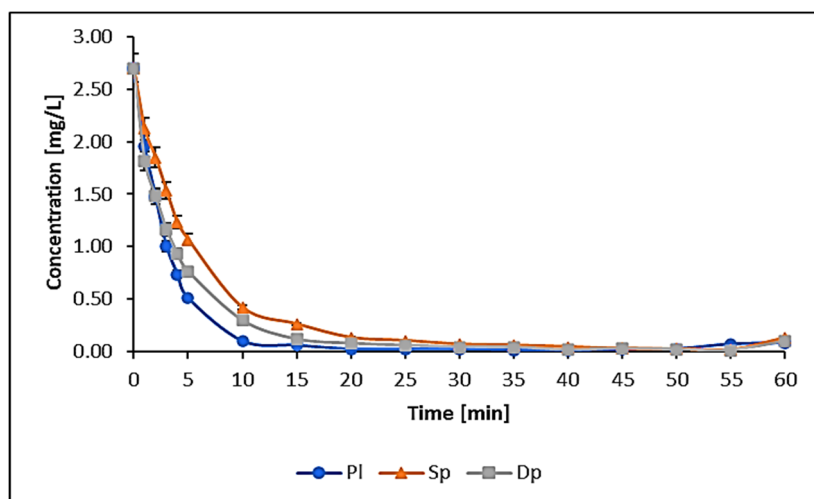

b)

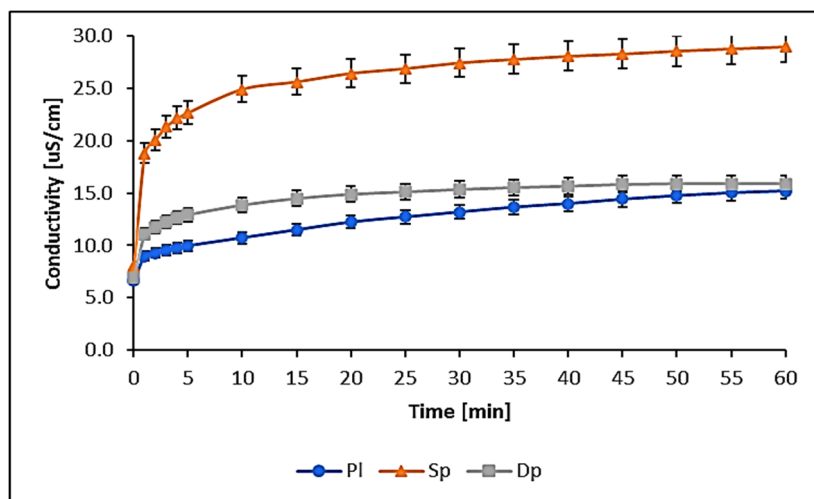

c)

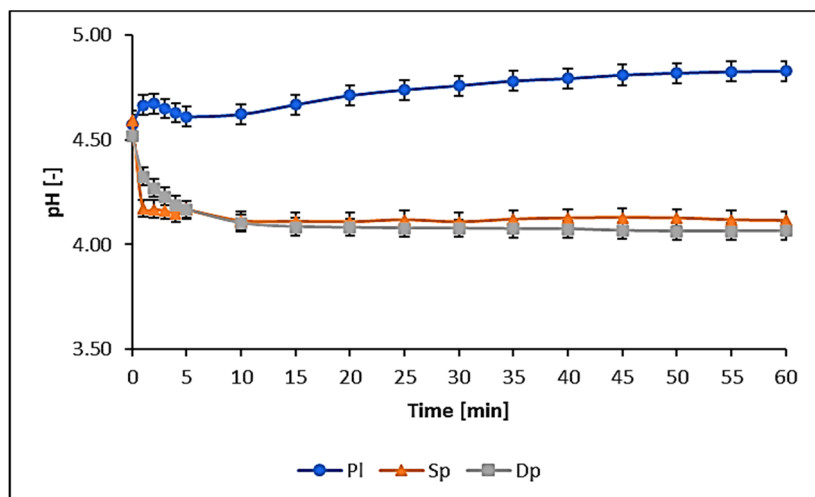

**Figure S4.** Changes in physicochemical parameters in Pb solution during the accumulation process on moss gametophytes: a) its concentration, b) conductivity, c) pH

**Table S1.** Concentrations of metals naturally accumulated in the mosses used for the experiments [mg/g d.w.]

| Biomonitor          | Ni      | Cu      | Zn   | Cd       | Pb      |
|---------------------|---------|---------|------|----------|---------|
| <i>P. schreberi</i> | < 0.001 | < 0.001 | 0.04 | < 0.0003 | 0.003   |
| <i>S. fallax</i>    | < 0.001 | < 0.001 | 0.03 | < 0.0003 | < 0.002 |
| <i>D. polysetum</i> | < 0.001 | < 0.001 | 0.04 | < 0.0003 | < 0.002 |
